# Supplementary material for: In situ polydopamine-assisted deposition of silver nanoparticles on a two dimensional support as an inexpensive and highly efficient SERS substrate
Source: Royal Society of Chemistry journal article supplement (doi:10.1039/c5ra03481g), 2015-01-01
Supplement: c5ra03481g1.pdf [file c5ra03481g1.pdf]

## Electronic Supplementary Information

### *In situ* ploydopamine-assisted deposition of silver nanoparticles on two dimension support as an inexpensive and highly efficient SERS substrate

Peilan Wang<sup>a</sup>, Yanling Zhou<sup>a</sup>, Ying Wen<sup>\*a</sup>, Feng Wang<sup>\*a</sup>, Haifeng Yang<sup>\*a</sup>

<sup>a</sup> The Education Ministry Key Lab of Resource Chemistry, Shanghai Key Laboratory of Rare Earth Functional Materials, Shanghai Municipal Education Committee Key Laboratory of Molecular Imaging Probes and Sensors, and Department of Chemistry, Shanghai Normal University, Shanghai, 200234, P. R. China.. E-mail: ying.wen@shnu.edu.cn, wangfeng@shnu.edu.cn, hfyang@shnu.edu.cn

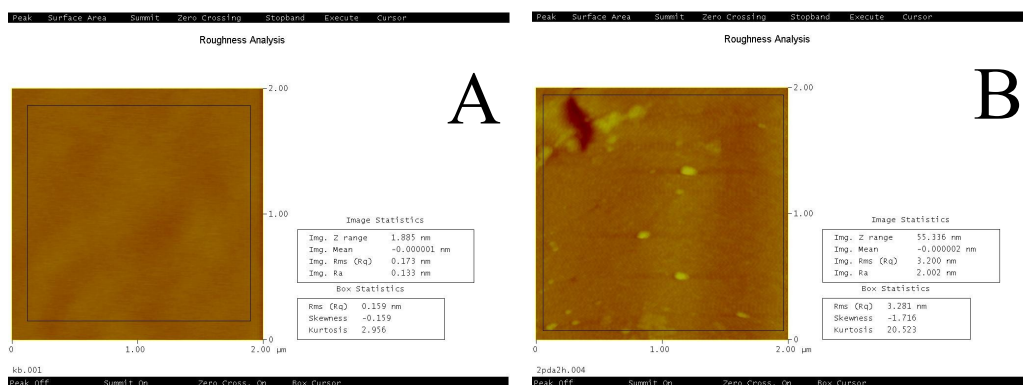

**Fig. S1** AFM images of (A) Blank and (B) PDA coated silica substrate.

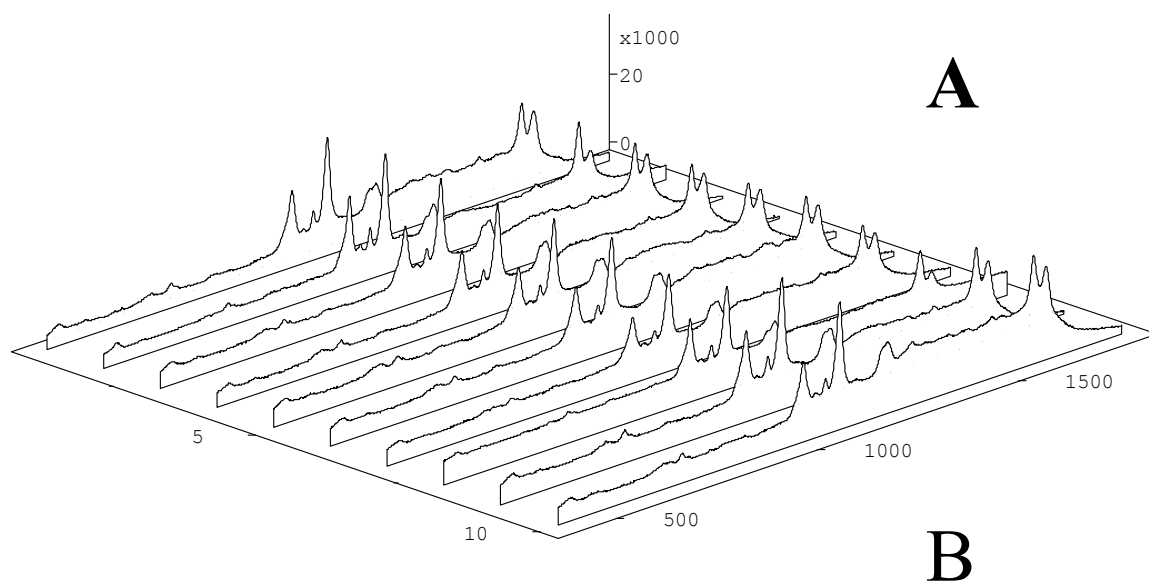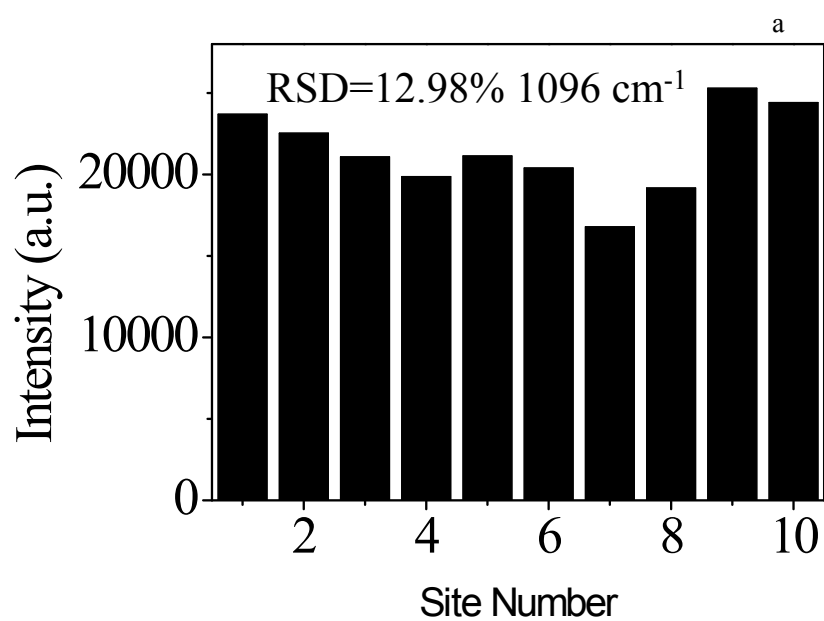

**Fig. S2** (A) SERS spectra of  $10^{-6}$  M 4-Mpy collected on 10 different AgNPs/PDA substrates. (B) The corresponding intensities of the main Raman peaks at  $1096\text{ cm}^{-1}$ .

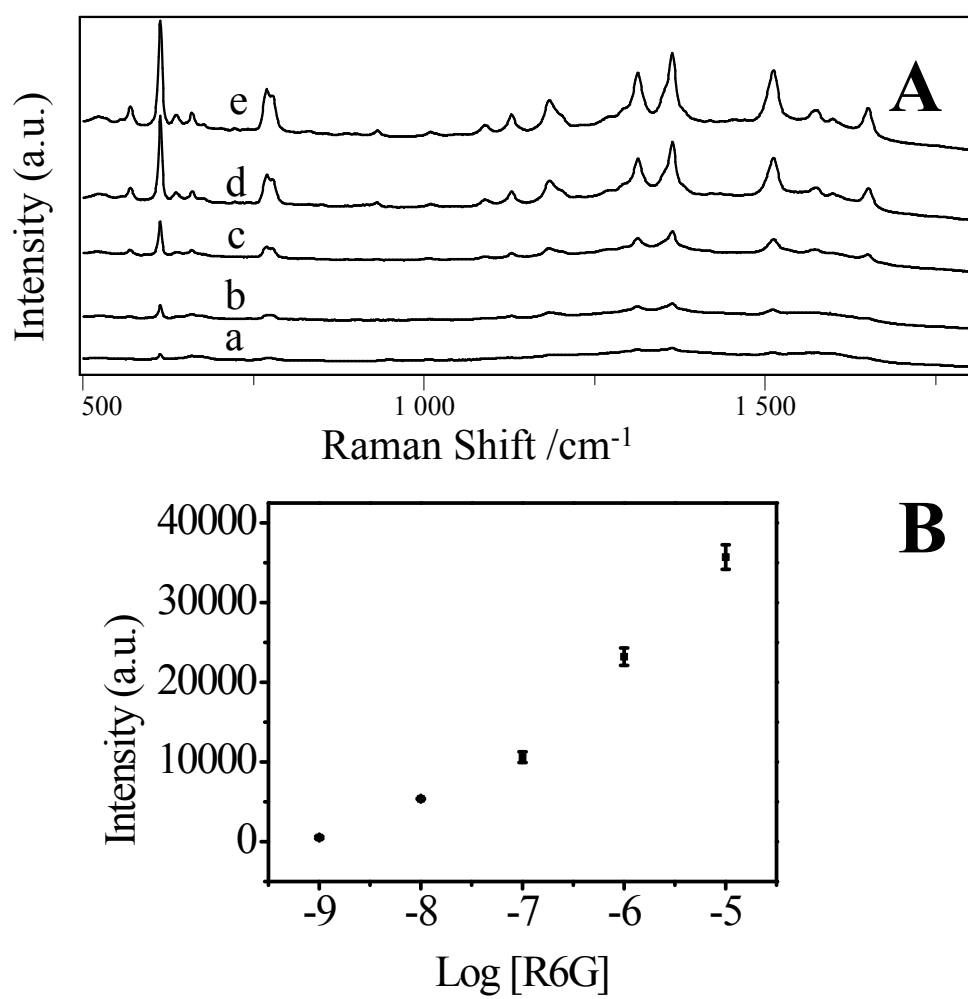

**Fig. S3** (A) SERS spectra of R6G with various concentration (a)  $10^{-9}$  M, (b)  $10^{-8}$  M, (c)  $10^{-7}$  M, (d)  $10^{-6}$  M, (e)  $10^{-5}$  M; (B) The linear relationship between the Raman intensity at  $613\text{ cm}^{-1}$  and R6G concentration.

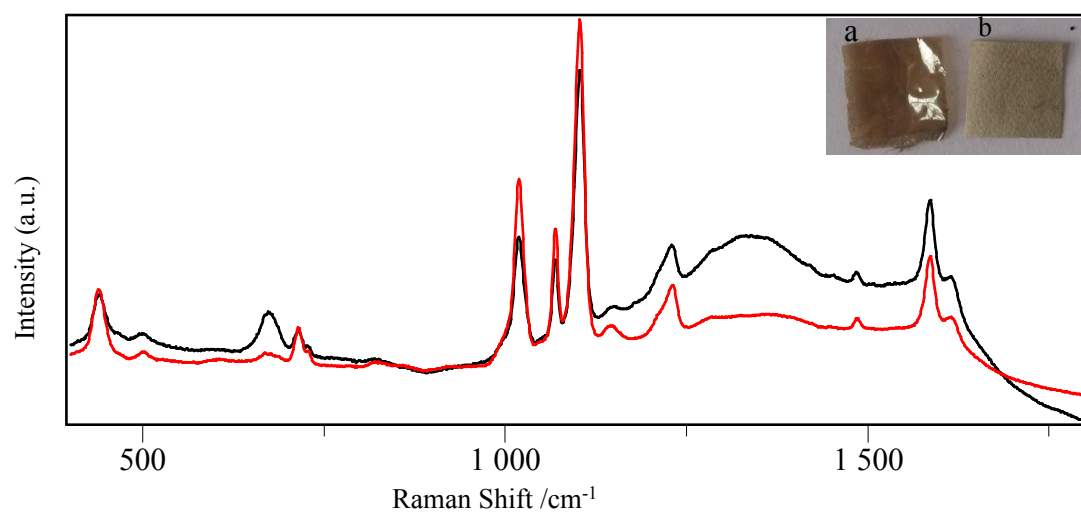

Fig. S4 SERS spectra of  $10^{-6}$  M 4-Mpy on prepared substrates using (a) PE film and (b) filter paper as solid supports.
